# Supplementary material
Source: PubMed Central journal article supplement (PMC3092949)
Supplement: 97320630006153S1.pdf [file 97320630006153S1.pdf]

## Supplementary material:

**Table 1:** Characteristics of the analyzed microarray data sets

| Author                                | Accession no. | Platform                             | Sample Information                                  |
|---------------------------------------|---------------|--------------------------------------|-----------------------------------------------------|
| Ivashkiv LB et.al 2008<br>Unpublished | GSE10500      | GPL8300<br>[HG_U95Av2]               | Synovial macrophages Samples 8<br>4-RA donor, 4-ND  |
| Ungethuem U et.al 2004<br>Unpublished | GSE1919       | GPL91 [HG_U95A]                      | Synovial fibroblasts Samples-15<br>5-RA, 5-OA, 5-ND |
| Huber R et.al 2008                    | GSE12021      | GPL96 [HG_U133A]<br>GPL97 [HG_U133B] | Synovial membrane<br>Samples-15<br>5-RA, 5-OA, 5-ND |

**Table 2:** Summary of parameters applied on the microarray data sets for the meta-analysis

| Dataset         | Entities Selected | Statistical Test | Fold Change cut off | p-Value cut off |
|-----------------|-------------------|------------------|---------------------|-----------------|
| <i>GSE12021</i> | 586/22283         | ANOVA            | $\geq 2.0$          | $\leq 0.05$     |
| <i>GSE1919</i>  | 941/1318          | ANOVA            | $\geq 2.0$          | $\leq 0.05$     |
| <i>GSE10500</i> | 723/940           | t-Test           | $\geq 2.0$          | $\leq 0.05$     |

**Table 3:** Differentially expressed genes observed in RA datasets, which have already been reported in literature

| Enterez Gene Name                                        | Gene Symbol | Function                            | Fold Change |
|----------------------------------------------------------|-------------|-------------------------------------|-------------|
| Interleukin 1 receptor accessory protein                 | IL-1RAP     | Cytokine                            | 3.225       |
| Interleukin 8                                            | IL-8        | Chemokine                           | 4.851       |
| Tumor Necrosis Factor                                    | TNF         | Cytokine                            | 5.231       |
| Matrix metalloproteinase 1                               | MMP-1       | Enzyme                              | 4.379       |
| Nuclear factor of activated T cells                      | NFAT        | Transcription factor                | 2.333       |
| JUN oncogene                                             | cJUN        | Transcription regulator             | 3.343       |
| T-cell receptor alpha locus                              | TRA@        | Receptor                            | 2.391       |
| Activating Transcription factor                          | ATF4        | Transcription factor                | 3.512       |
| Chemokine (C-C motif) ligand7                            | CCL7        | Chemokine                           | 9.241       |
| V-maf musculoaponeurotic fibrosarcoma oncogene homolog F | MAFF        | Transcription factor & regulator    | 10.069      |
| GTP binding protein overexpressed in skeletal muscle     | GEM         | Signal Transduction                 | 17.020      |
| Nuclear receptor subfamily 4, group A, member2           | NR4A2       | Signal Transduction                 | 13.046      |
| Interleukin10 receptor, alpha                            | IL-10RA     | Anti-inflammatory cytokine receptor | -2.713      |
| Interleukin10 receptor, beta                             | IL-10RB     | Anti-inflammatory cytokine receptor | -2.171      |
| Vascular endothelial growth factor A                     | VEGFA       | Angiogenesis                        | 3.860       |
| Tumor necrosis factor superfamily member 14              | TNFSF14     | cytokine                            | 7.698       |
| Interleukin 15                                           | IL 15       | cytokine                            | 3.174       |

**Table 4:** Differentially regulated pro-inflammatory gene signatures observed in RA and OA datasets

| Enterez Gene name                            | Gene Symbol  | Function                 | Fold Change (RA) | Fold Change (OA) |
|----------------------------------------------|--------------|--------------------------|------------------|------------------|
| Interleukin1 receptor antagonist             | IL1RN        | Cytokine receptor        | 4.230            | -1.132           |
| Tumor necrosis factor superfamily member11   | TNF-SF11     | Cytokine                 | 4.380            | 1.309            |
| Interleukin 15                               | IL15         | Cytokine                 | 3.223            | 1.793            |
| Interleukin 8                                | IL8          | Chemokine                | 1.248            | -2.554           |
| (C-X-C motif)ligand 12                       | CXCL12       | Chemokine                | 3.153            | 4.809            |
| Chemokine (C-C motif) ligand5                | CCL5         | Chemokine                | 48.605           | 8.177            |
| Fc fragment of IgG,high affinity Ia receptor | FCGR1A       | Immunoregulatory gene    | 6.247            | 3.165            |
| Fc fragment of IgG, low affinity IIIb        | FCGR3A       | Immunoregulatory gene    | 4.019            | 2.956            |
| Transcription Factor 7                       | TCF-7        | Transcription factor     | 42.261           | 1.045            |
| Mitogen activated protein kinase 1           | MAPK1        | Kinase                   | 2.578            | 1.820            |
| Matrix Metalloprotenaise 3                   | MMP3         | Enzyme                   | 43.766           | 31.002           |
| Matrix Metalloprotenaise 1                   | MMP1         | Enzyme                   | 62.092           | 23.224           |
| Phospholipase C gamma 2                      | PLCG2        | Enzyme                   | 2.143            | 1.464            |
| Phospholipase C beta 1                       | PLCB1        | Enzyme                   | -2.613           | 2.455            |
| Protein Kinase C beta                        | PRKCB        | Kinase                   | 7.294            | -1.003           |
| Ras related C3 botulin toxin substrate 2     | RAC2         | Enzyme                   | 14.468           | 5.668            |
| Vascular endothelial growth factor           | VEGFC        | Angiogenic growth factor | 3.251            | 5.532            |
| T-cell receptor alpha locus                  | TCR $\alpha$ | Receptor                 | 23.112           | 2.644            |
| Chemokine (C-C motif) receptor5              | CCR5         | Chemokine receptor       | 7.396            | 1.139            |
